# Supplementary material
Source: HighWire-hosted journal article supplement (doi:10.1101/rna.054221.115)
Supplement: SuppFigures.docx [file SuppFigures.docx]

**SUPPLEMENTAL FIGURES**

**
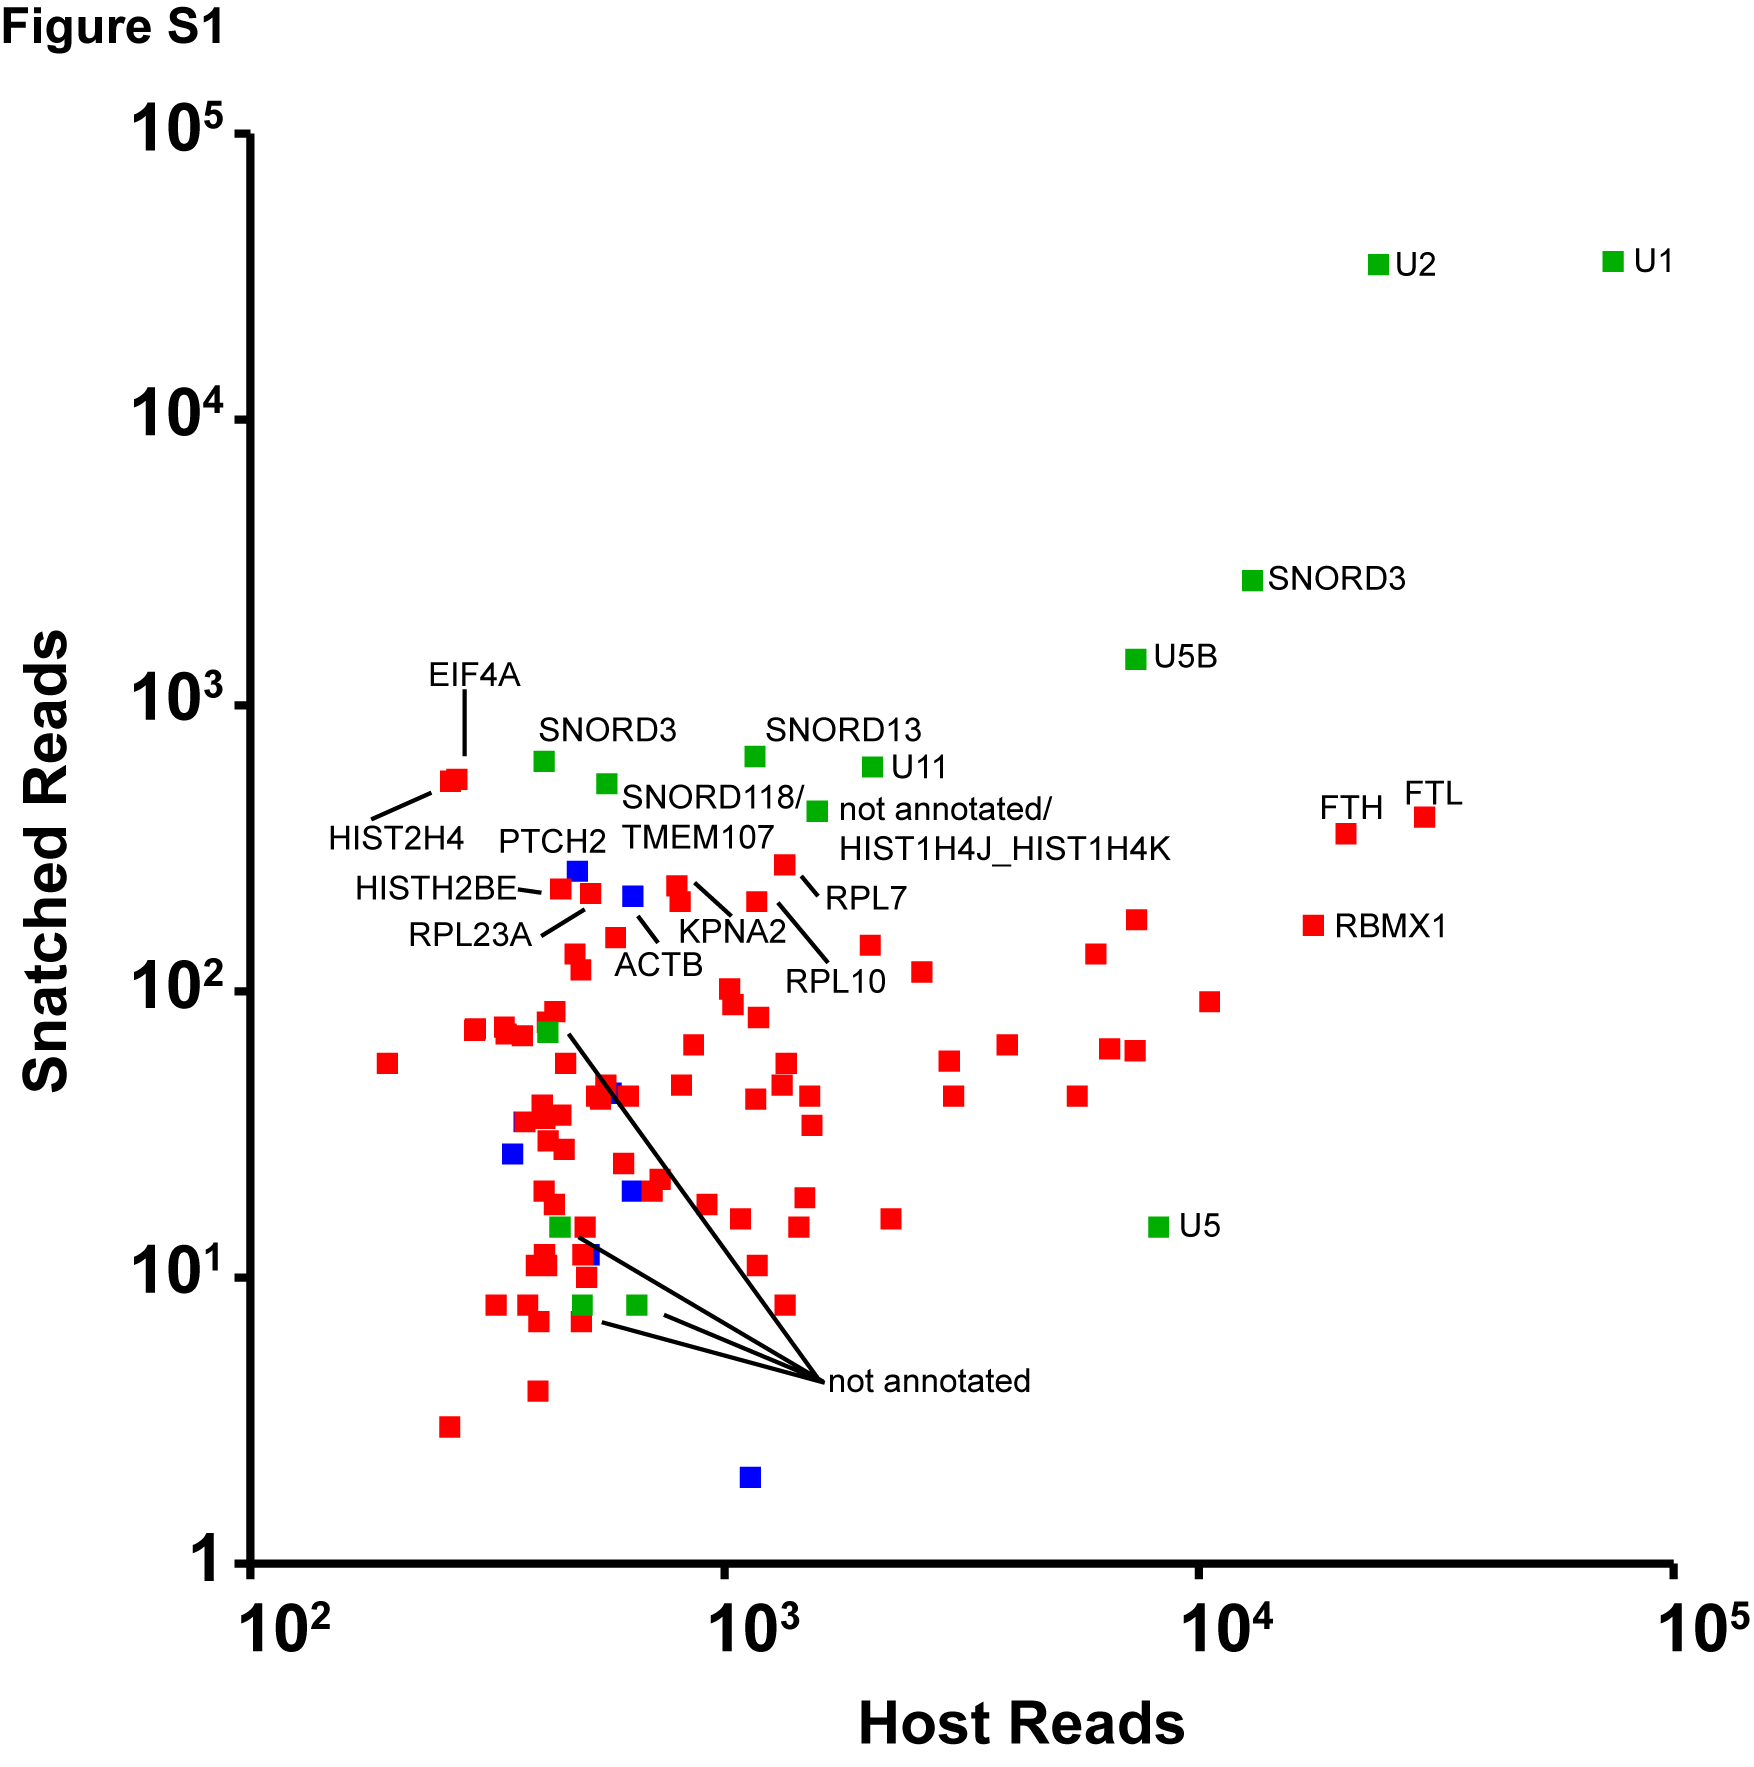
**

**Figure S1. The correlation of the level of snatched sequences with that of the donor RNAs at 12 h.** Y-axis, the read number of snatched sequences, and X-axis, the read number of the human donor RNAs. Green indicates snatched sequences matching non-protein coding regions, blue indicates sequences from protein coding regions but not within known TSS regions, and red indicates snatched sequences in the -100 to +100 regions of the TSSs of protein coding genes.

**
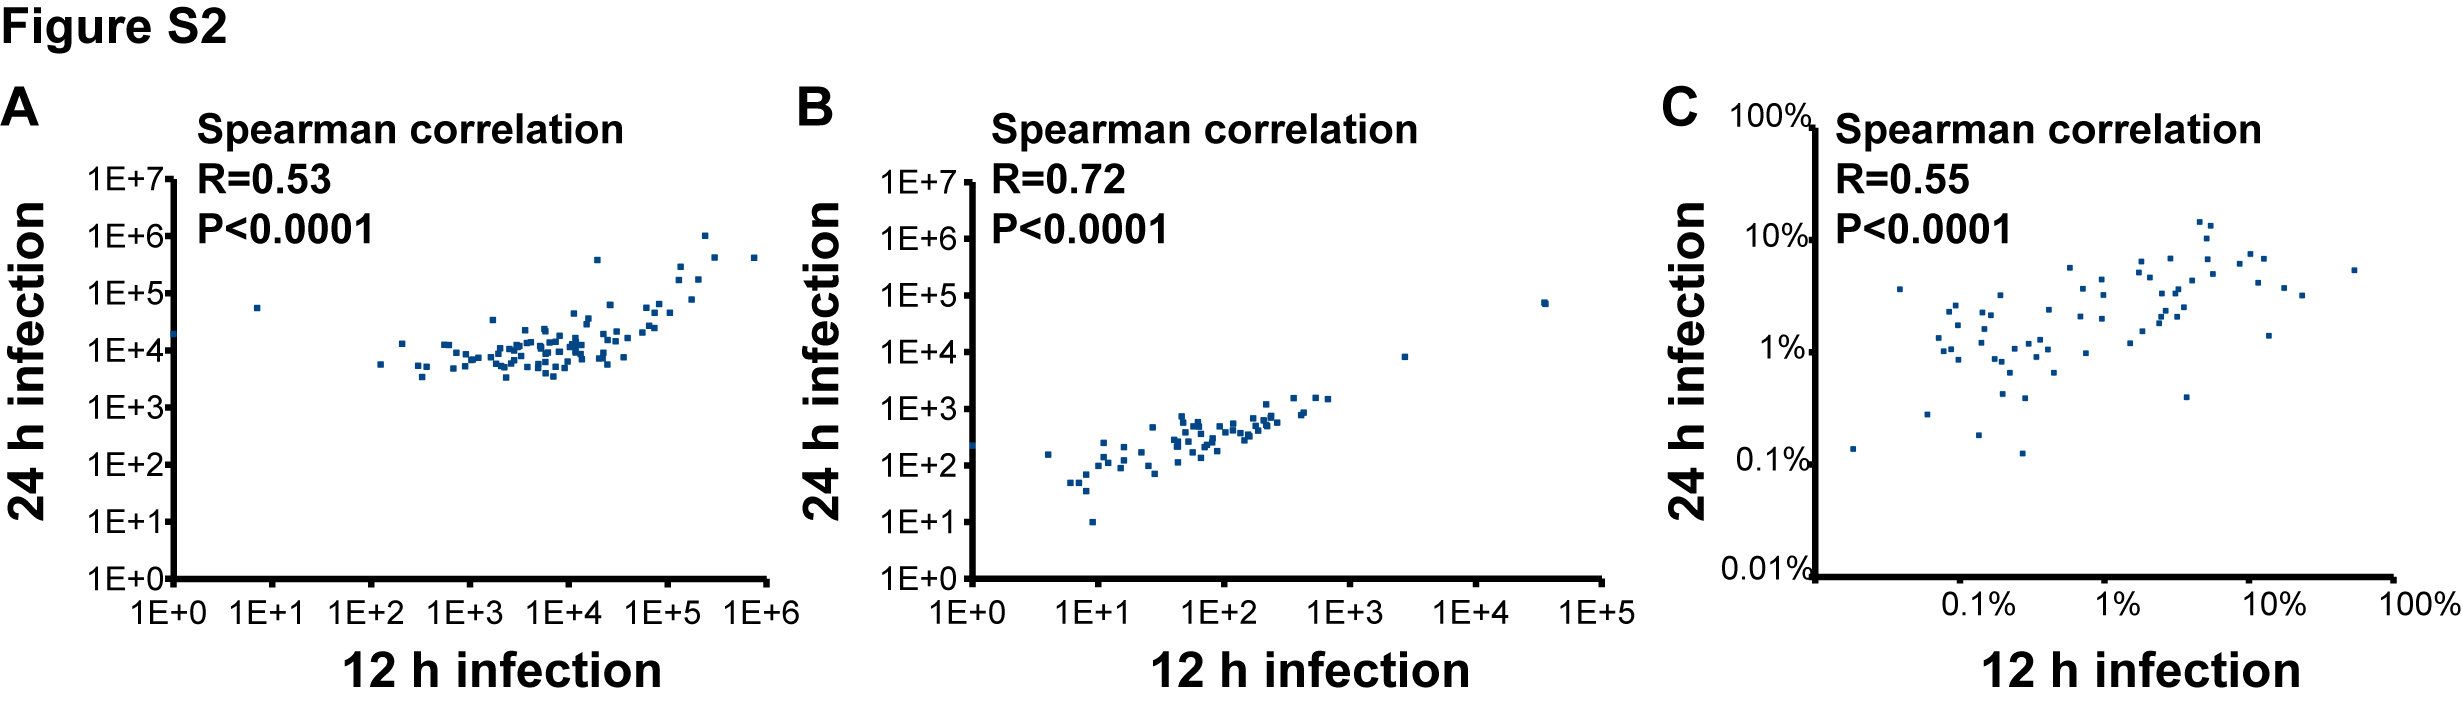
**

**Figure S2. Correlation analyses of the 12 h and 24 h virus infected samples.** (**A**) The expression levels of the top 100 host RNAs were compared with X representing 12 h infection and Y representing 24 h infection; (**B**) The levels of snatched caps from the top 100 host RNAs were compared; (**C**) the snatching rate (snatched/[snatched+host]) are compared. Non-parametric Spearman correlation was performed.

Note: Although the overall target preference between the 24 h and 12 h infected samples from the two independent experiments is very similar, the rate for individual targets varies between samples. This was mostly caused by variations of donor RNA reads between samples, such as U1 and U2 snRNA read number. We speculate that the low ligation rate and high PCR number (~28 cycles total) may contribute to such variations since: 1) we used very little material, usually 1-2 μg of total RNAs, and only cloned the 5' ends of RNAs, meaning that each RNA molecule was only cloned once regardless of its size. In contrast, each RNA could be cloned into 10-20 smaller pieces in general RNA-Seq; and 2) in CapSeq we ligate a 5' linker to full-size RNAs, thus possibly resulting in a low ligation efficiency for certain RNAs due to RNA secondary structures. Despite these variations, we observed very significant correlations between host RNA levels across samples, especially between different non-infected control samples (data not shown). Nonetheless, if we compare overall capped snRNAs/snoRNAs with overall mRNAs, rather than just individuals, we observed consistently higher rates for snRNAs and snoRNAs (P <0.001 and 0.0001 for 12 h and 24 h infected samples respectively).

**
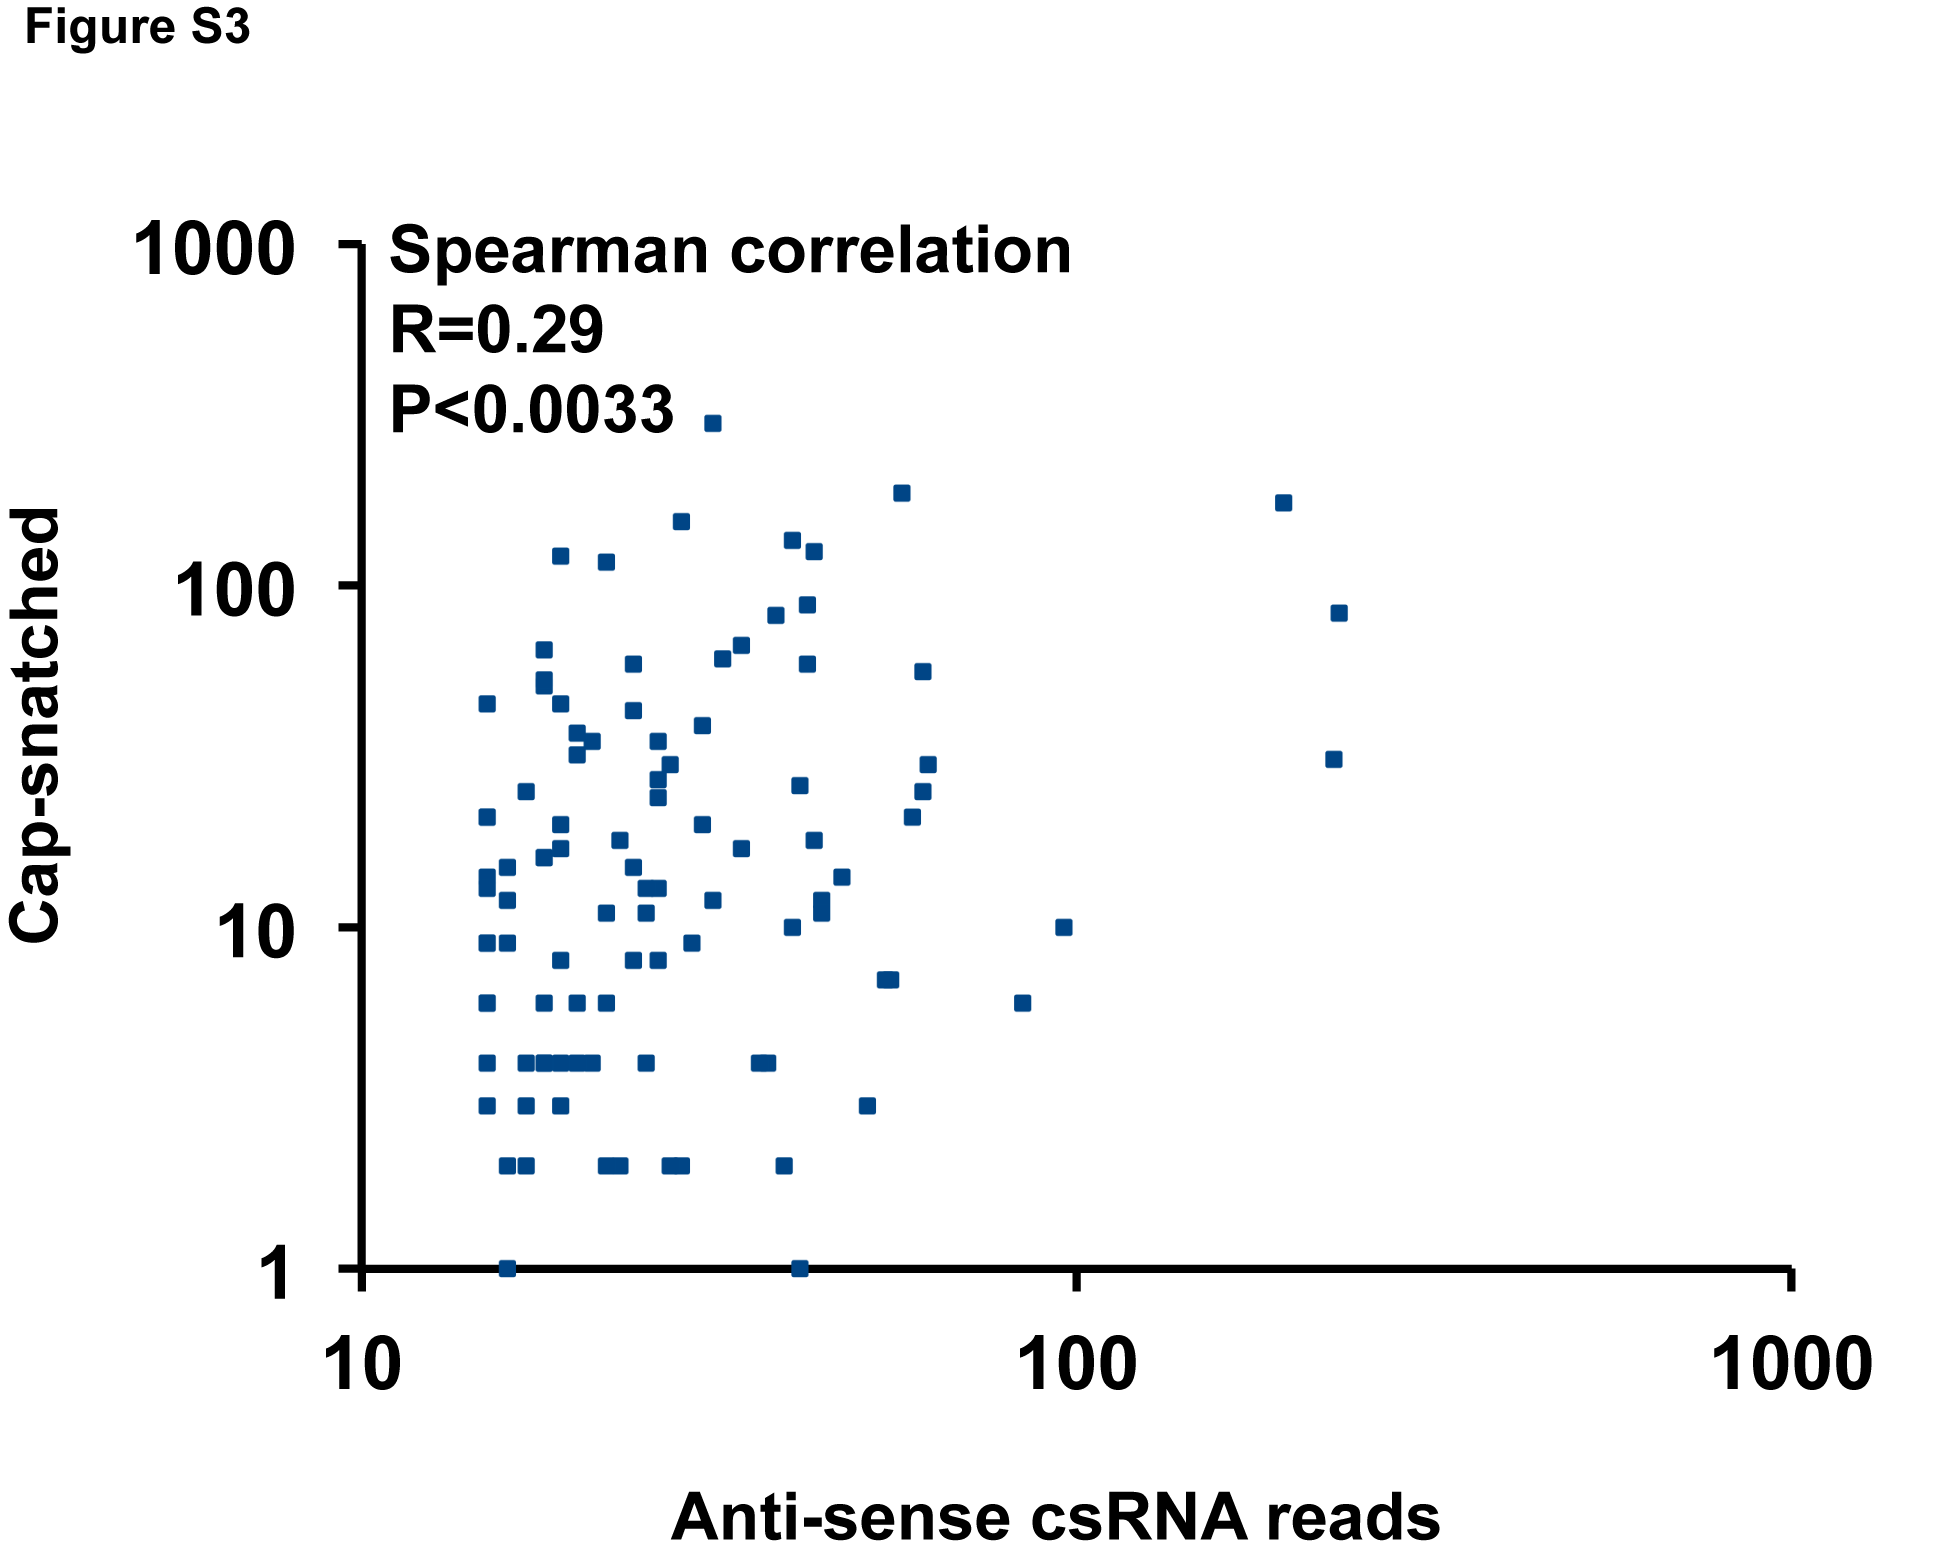
Figure S3. Correlation between levels of top 100 host anti-sense csRNAs and caps snatched by IAV.**

**
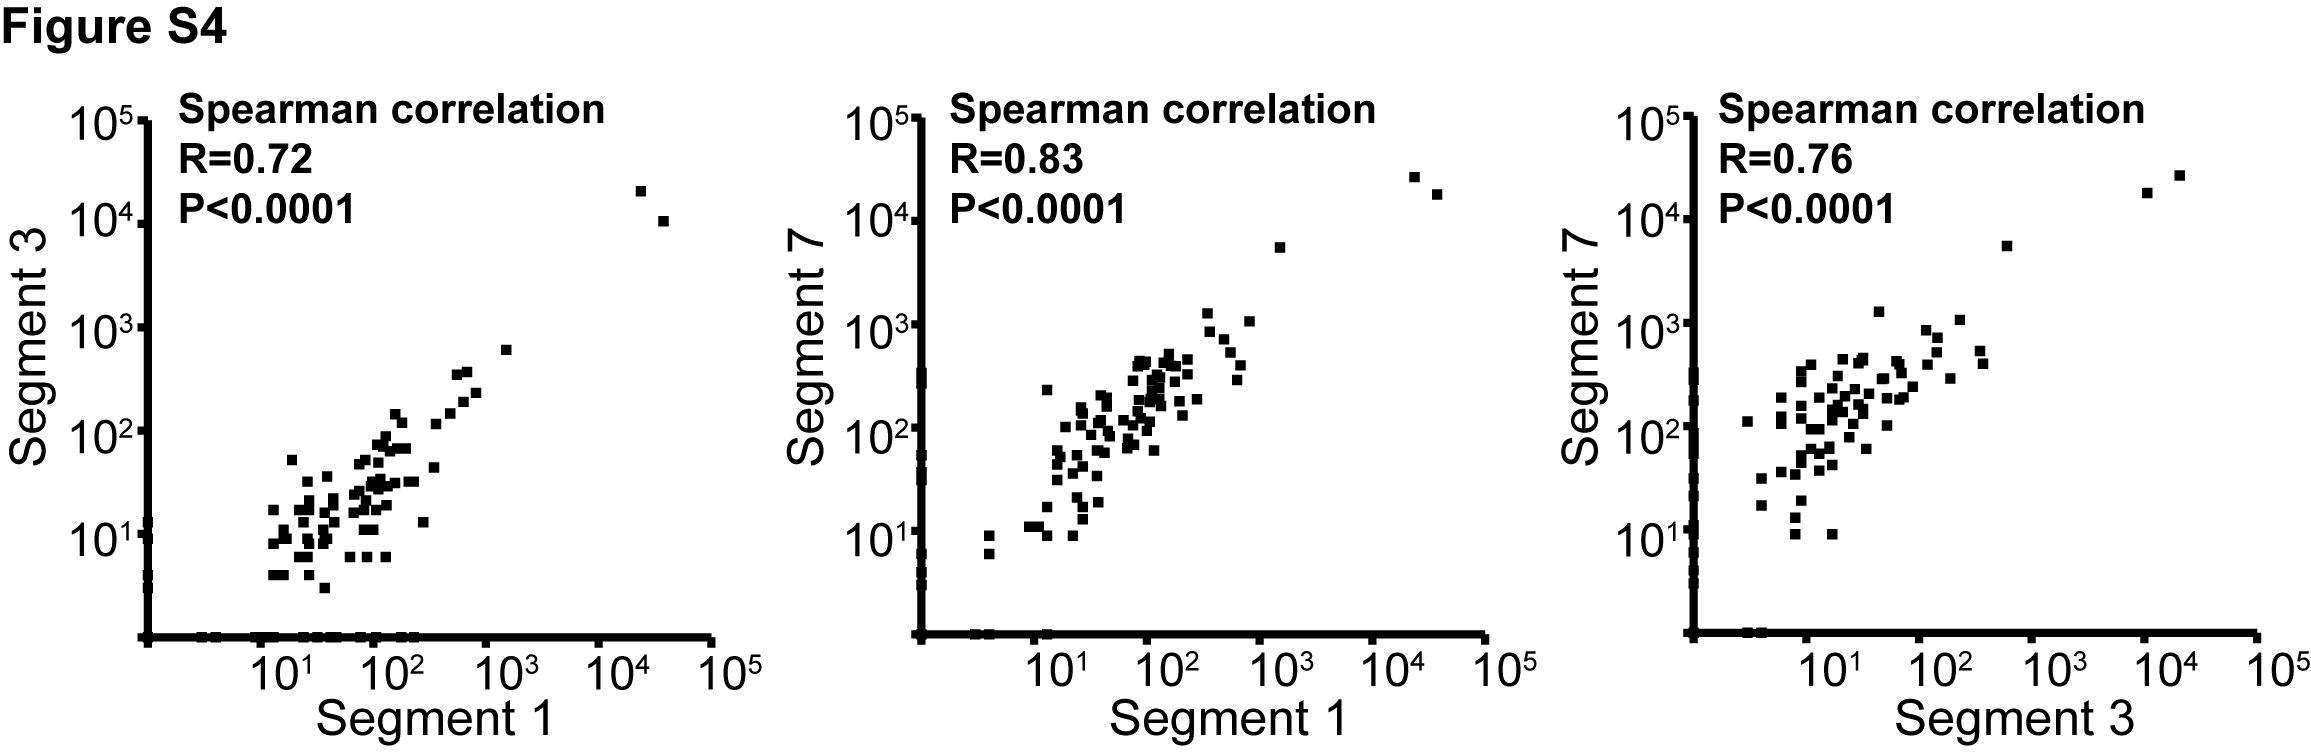
Figure S4. Correlation of snatched caps on different viral mRNAs.** The top 100 most frequently snatched caps were compared between different viral mRNAs.
