# Supplementary material
Source: HighWire-hosted journal article supplement (doi:10.1101/rna.054221.115)
Supplement: SuppFiles.docx [file SuppFiles.docx]

**Supplementary file 1. Detailed Materials and Methods**

***Detailed Steps in Bioinformatic Analyses***

*1. Estimating the fidelity of CapSeq reads identified as potential TSSs*. To estimate whether CapSeq reads map the actual 5′ ends of capped transcripts, as opposed to the 5' ends of internally truncated RNAs, we performed two analyses: 1) analysis of the distribution of human mRNA reads; 2) analysis of the distribution of influenza virus mRNA reads. For each method, we only analyzed the density of the 5' ends of CapSeq reads. In method 1, since many annotated mRNA TSSs may not be the actual TSSs or not used in certain cell types, we used the -100 to +100 regions of annotated mRNA TSSs as potential TSS regions. We first removed any reads matching both mRNAs and structural RNAs such as tRNAs and rRNAs (which could localize to the same genomic loci), and reads matching multiple genomic loci. Any reads falling within these -100 to +100 regions of mRNA TSSs were obtained and divided by the total sites of these regions as the read density of TSSs. The total of other CapSeq reads matching other regions of mRNAs were obtained and divided by the total sites to obtain the read density of non-TSSs. The ratio of the TSS density over the non-TSS density is about 60-fold, indicating that on average a TSS had 60-fold more reads compared to a non-TSS. This TSS enrichment is much lower than the previous CapSeq data obtained for *C. elegans*. We speculated that the low enrichment may result from the poor annotations of human TSSs and the large range (-100 to +100) we used to define the TSS regions.

As an alternative but more accurate approach to estimate the TSS enrichment, we analyzed the reads matching influenza virus mRNAs using a similar strategy. Since the influenza genome is well annotated with accurate information about the TSSs of mRNAs, we only considered the +1 sites of mRNAs as the TSSs, rather than a range of -100 to +100. We analyzed the segments of the influenza virus genome separately to avoid potential bias caused by highly expressed segments, and got enrichments of TSSs over non-TSSs ranging from ~3,500- to ~120,000-fold. The average TSS enrichment for all the segments was ~77,500-fold, which was in line with the TSS enrichment in the CapSeq data previously published ([11](#_ENREF_11)). This suggests that method 1 significantly underestimates the fidelity of the human CapSeq reads as authentic TSS-associated reads, likely due to the annotation inaccuracy or cell-type-specific transcription initiations.

*2. Debarcoding and processing the reads.* Single-end high-throughput sequencing reads of 50 or 100 nucleotides were obtained using a HiSeq 2000 platform. A custom PERL script was used to sort the reads according to the barcodes and then remove the barcodes. To simplify the analysis, we only used the first 40 nucleotides of each read, minimizing the effects of sequencing errors on the analysis.

*3. Mapping reads derived from human RNAs.* The processed 40 nucleotide reads were then mapped to the human genome and annotations using Bowtie 0.12.7 with the parameter '-n 2 -l 26 -e 120 -a --best --strata -m 200'. The -n 2 parameter allows up to 2 mismatches in the seed region which is the first 26 nucleotides (-l 26); the '-e 120' parameter allows for up to 4 mismatches; the '-a --best –strata' parameter only returns the best matches to the seed region; and '-m 200' only reports RNA reads with less than 200 best seed matches. For each read, a custom PERL script was used to identify matching loci with the least overall mismatches including the mismatches in the non-seed regions, and to remove other loci. This script also removed reads if their best matches still contain at least 4 mismatches. Therefore, all the final matches contain at most 3 mismatches. If the human genome is considered as more or less random sequences, for a random 40 nucleotide sequence, the chance of matching it to the human genome by allowing at most 3 mismatches is 3 x 109 (human genome size) x 2 (two genome strands) x (1 wild type + 120 one-nucleotide mutants + 7020 two-nucleotide mutants + 266760 three-nucleotide mutants) /440 = 1.4 x 10-9, i.e., the false positive rate. Here we ignored the exon-exon matches, which may increase the false positive rate, but not to a significant degree (40 non-genomic sequences per exon-exon x ~0.3 million exon-exon junctions + 3 x 109 instead of using only 3 x 109).

*4. Matching reads to the influenza genome*. Each unmatched read in the above step was split into two parts: the first 20 nucleotides and the last 20 nucleotides. The last 20 nucleotide reads were mapped to the influenza virus genome using Bowtie with the parameters: -v 1 -a --best --strata -m 10. The -v 1 parameter allows up to one mismatch in the seed region which is the whole 20 nucleotides here; the '-a --best –strata' parameter only returns the best matches to the seed region; and '-m 10' only reports RNA reads with less than 10 best matches. For each read, a custom script was used to identify the loci with the least mismatches including the mismatches in the non-seed regions, and to remove other loci. If the influenza virus genome is considered as more or less random sequences, for a random 20 nucleotide sequence, the chance of matching it to the influenza genome by allowing at most 1 mismatch is 13,626 (influenza virus genome size) x 2 (two strands) x 61 (1 wild type + 60 one-nucleotide mutants) /420 = 1.5 x 10-6, i.e., the false positive rate.

To identify the longest or full matches for each 40 nucleotide read, the last 20 nucleotide matches, as described above, were extended towards the 5' ends of virus mRNAs with bonus +1 for each nucleotide match and penalty -3 for each mismatch using a custom PERL script. The full matches were the extended matches with the highest extension scores. After the extension, the non-match parts are considered as the sequences snatched from human capped RNAs. This extension algorithm does not allow indels, which could generate some false-positive extra sequences.

*5. Analyzing the size and the first nucleotide of the snatched sequences linked to influenza mRNAs.* The non-matched sequences 5' of the influenza virus mRNAs were extracted, respectively, and analyzed for the size distribution. The result was normalized to 10 millions of non-structural human RNAs.

*6. Identifying human Pol II TSSs*. As discussed before, the CapSeq reads strongly prefer Pol II TSSs over non-TSSs with a 77,500-fold enrichment. However, most CapSeq reads do not start at the annotated TSSs, but at positions several nucleotides flanking these annotated TSSs. To associate these reads with the gene annotations, we assigned these reads to the nearby genes if the reads were within -100 to +100 regions of annotated TSSs in the same direction (sense TSS-associated), and within -300 to -1 regions of annotated TSSs in the opposite direction (anti-sense TSS-associated).

*7. Analysis of motifs associated with TSSs using CapSeq reads*. Sense TSS-associated reads were identified in step 6, and the resulting loci were used to analyze the TSS motif. The -35 to 15 sequences surrounding the +1 positions of the TSS-associated CapSeq reads were extracted and aligned starting from the first nucleotides, and each site was only counted once in the analysis, thus avoiding the heavy weight-associated bias potentially caused by TSSs with highly abundant reads. Sequencing errors such as indels could result in mapped loci shifted by one or more nucleotides. Since the indel rate is fairly low, usually only loci matched with abundant reads could be accompanied by adjacent loci, usually within 1 or 2 nucleotides, matched with reads of low abundance. Although we did not allow indels when aligning reads to the genome, the alignment algorithm could mistake indels near the ends of the reads, especially the first and the last nucleotides, as mismatches. Therefore, we used a filter to remove any TSS-associated reads if there was a TSS with 10-fold more reads either immediately upstream or downstream.

*8. Mapping the snatched sequences to the TSSs defined in step 6*. The snatched sequences of ≥10 nucleotides in size were mapped to the TSSs regions predicted in step 6 with the first nucleotides aligned exactly with the TSSs and the whole sequences mapped without mismatches. If the whole snatched sequences cannot be perfectly aligned with any TSSs, the sequences were truncated by one nucleotide at the 3' end and mapped to the TSSs again. The sequences were further truncated stepwise until a perfect match was found or the sequences were shorter than 10 nucleotides. Because most snatched sequences are ~11 nucleotides, the truncations were usually one or two nucleotides. The reasons for allowing truncations are: 1) the virus 5' ends are heterogeneous and a small fraction may contain additional A's or other nucleotides; 2) mutations occurring at the +1, +2, and +3 positions of virus mRNAs are not allowed because of the +1 bonus for a match and -3 penalty for mismatches, so that the extension script as discussed above can not extend virus matches to cover mismatches in these 3 positions; 3) sequencing errors generate indels. All these could lead to unmatched sequences 5' of the matched parts but 3' of the snatched sequences, thus requiring removal of unmatched virus sequences.

*9. Grouping human CapSeq reads*. The snatched sequences could be derived from several human genomic loci, some of which are annotated while the others are not. This complicates the analysis to identify the source of the snatched sequences. We noticed when a snatched sequence could be derived from several genomic loci, many sequences derived from these loci can be collapsed into only a few very similar sequences or only one sequence by allowing 1-2 mismatches within the first 30 nucleotides of the CapSeq reads. The reason for using the first 30 nucleotides rather than the full size 40 nucleotides is that it generates less groups and reasonable computation load.

For example,

ATCGCTTCTCGGCCTTTTGGCTAAGATCAAGTGTAGTATC,

TCGCTTCTCGGCCTTTTGGCTAAGATCAAGTGTAGTATCT,

ATCGCTTCTTGGCCTTTTGGCTAAGATCAAGTGTAGTATC, and ATCACTTCTCGGCCTTTTGGCTAAGATCAAGTGTAGTATC, are very similar sequences, and thus are considered as one group. This group is represented by the most abundant sequence, ATCGCTTCTCGGCCTTTTGGCTAAGATCAAGTGTAGTATC, i.e., U2 snRNA. With this strategy we can make a clear list of the snatched sequences vs. the source human sequences.

*10. Associating snatched sequences with human CapSeq reads*. As discussed in step 9, the human CapSeq reads were grouped and each group was represented with the most abundant sequence in that group. Therefore the group can be associated with the annotation of the most abundant sequence, if the annotation is known. The snatched sequences associated with each group member were pooled together as the total sequences snatched from this group. Some snatched sequences, especially short ones, may be associated with two or more groups because these groups did not share sufficient sequence similarity and the short sequences did not allow us to assign them uniquely. If a snatched sequence can be associated with CapSeq reads at the sense TSSs of protein coding genes, as described in step 8, this snatched sequence was exclusively assigned to the protein coding category when counting the total snatched sequences derived from protein coding genes, even if it may also be derived from other non-protein loci. The rest of the snatched sequences were counted as derived from non-coding loci.

***Detailed analysis and calculations of sources of unidentified caps***

Our highly stringent analysis and an incomplete coverage of host TSSs resulted in 49% of caps snatched from 'unidentified' host capped RNAs; however, we can account for 85% of these caps as described in the following analysis. Some snatched caps contained extra nucleotides (e.g., 'GCA') added by a process known as 'prime-and-realign' ([20](#_ENREF_20), [21](#_ENREF_21)). After trimming these extra nucleotides, ~6% of all caps used in our analysis were <10 nucleotides and were therefore removed from the analysis because they may map to multiple sites in the genome. To further avoid multiple genomic hits by individual reads, we did not allow mutations or indels when defining host-matching reads and when matching the snatched caps to the defined host reads. Based on mutation analysis of reads matching host sequence, ~15% of reads of 12 nucleotides long, the typical size of snatched caps, contain one mutation or indel. By including more TSSs defined using non-infected samples, and allowing mismatches to define host RNA reads, we increased the matching rate of snatched caps from 51 to 64%. This rate could be further increased if we allow mismatches between the snatched caps and the defined host reads. However, such a manipulation significantly increases multiple hits, and thus was not adopted in our analysis. In all, we can account for 85% (64% + 6% + 15%) of the snatched caps by including more host TSSs identified in two non-infected samples, considering mutations or indels of snatched caps, and including short caps. The remaining 15% of reads could be caused by underestimation of mutation rate, incomplete coverage of the host TSSs by our sequencing, or other factors.

**Supplementary file 2. Analysis of the snatching rate of top 20 abundant host RNAs in the 12 h infected sample1**

| **Gene name** | **Host** | **Snatched** | **Rate2** | **Location3** | **Sequence4** |
| --- | --- | --- | --- | --- | --- |
| RNU1 | 746498 | 35696 | 4.56% | non-protein coding | ATACTTACCTGGCAGGGGAGATACCATGATCACGAAGGTG |
| RNU2 | 239042 | 34822 | 12.72% | non-protein coding | ATCGCTTCTCGGCCTTTTGGCTAAGATCAAGTGTAGTATC |
| SNORD3 | 129697 | 2732 | 2.06% | non-protein coding | AAGACTATACTTTCAGGGATCATTTCTATAGTGTGTTACT |
| RNU5B-1 | 73596 | 1450 | 1.93% | non-protein coding | ATACTCTGGTTTCTCTTCAGATCGTATAAATCTTTCGCCT |
| SNORD13 | 11581 | 664 | 5.42% | non-protein coding | GATCCTTTTGTAGTTCATGAGCGTGATGATTGGGTGTTCA |
| SNORD3* | 4162 | 638 | 13.29% | non-protein coding | GTTAAGACTATACTTTCAGGGATCATTTCTATAGTGTGTT |
| RNU11 | 20488 | 609 | 2.89% | non-protein coding | AAAAAAGGGCTTCTGTCGTGAGTGGCACACGTAGGGCAAC |
| EIF4A1 | 2727 | 552 | 16.83% | coding_TSS | CTAGTTTCTAAGGATCATGTCTGCGAGCCAGGATTCCCGA |
| HIST2H4A_  HIST2H4B | 2641 | 543 | 17.05% | coding_TSS | AGAAGCTGTCTATCGGGCTCCAGCGGTCATGTCCGGCAGA |
| SNORD118/  TMEM107** | 5648 | 533 | 8.62% | coding_nonTSS/  non-protein coding | ATCGTCAGGTGGGATAATCCTTACCTGTTCCTCCTCCGGA |
| not annotated/  HIST1H4J_  HIST1H4K*** | 15672 | 427 | 2.65% | coding_TSS/  non-protein coding | ACAAAGCGTTGGGTGAGACTCCTCTTGCTCGTCATGTCTG |
| FTL | 298908 | 407 | 0.14% | coding_TSS | GCAGTTCGGCGGTCCCGCGGGTCTGTCTCTTGCTTCAACA |
| FTH1 | 204167 | 356 | 0.17% | coding_TSS | AGACGTTCTTCGCCGAGAGTCGTCGGGGTTTCCTGCTTCA |
| RPL7 | 13374 | 277 | 2.03% | coding_TSS | CTCTTTTTCCGGCTGGAACCATGGAGGGTGTAGAAGAGAA |
| PTCH2 | 4892 | 263 | 5.10% | coding_nonTSS | ATATACTCGGGTTTCTCTTCAAAGCGCATAAATCTTTCGC |
| KPNA2 | 7925 | 234 | 2.87% | coding_TSS | ACACGGTCTTTGAGCTGAGTCGAGGTGGACCCTTTGAACG |
| HIST2H2BE | 4514 | 228 | 4.81% | coding_TSS | ACTTCTTTTCTTGGCTAAGCCGCGTTTGTACTGTGTCTTA |
| RPL23A | 5216 | 220 | 4.05% | coding_TSS | ACAAGATGGCGCCGAAAGCGAAGAAGGAAGCTCCTGCCCC |
| ACTB | 6400 | 215 | 3.25% | coding_nonTSS | ACCGCCGAGACCGCGTCCGCCCCGCGAGCACAGAGCCTCG |
| RPL10 | 11689 | 206 | 1.73% | coding_TSS | CTCTTTCCCTTCGGTGTGGTGAGTAAGCGCAGTTGTCGTC |
| 1The sampling size was normalized to 10 million non-structural host RNA reads.  2Rates were calculated as [Snatched Reads/(Snatched Reads + Host Reads)]  3For “location”, coding_TSS, coding_nonTSS, and non-protein coding indicate that the sequence is derived from the TSS region of the corresponding gene, the non-TSS region of the corresponding gene, and a non-protein coding genomic locus, respectively.  4 The first 40 nucleotides of the RNA sequence are derived from the gene listed in the first column, and the number of times that the 5' end of this sequence was snatched is indicated by the number in the third column.  *Match (37/37bp) to SNORD3 by BLAST  **Sequence matches both SNORD118 (non-protein coding gene) and TMEM107 (coding_nonTSS)  ***Not annotated in the NCBI database, but could be a histone-H4 like protein based on ENSEMBL | | | | | |

**Supplementary file 3. Abundance of cap-snatched sequences by individual influenza virus segments in the 24 h infected sample (top 100 abundant host RNAs)1**

| **Gene Name** | **Host** | **S1** | **S2** | **S3** | **S4** | **S5** | **S6** | **S7** | **S8** | **Sequence2** |
| --- | --- | --- | --- | --- | --- | --- | --- | --- | --- | --- |
| RNU2 | 1018419 | 23767 | 903 | 20637 | 776 | 293 | 722 | 26467 | 1062 | ATCGCTTCTCGGCCTTTTGGCTAAGATCAAGTGTAGTATC |
| FTL | 422185 | 229 | 20 | 31 | 5 | 3 | 7 | 454 | 20 | GCAGTTCGGCGGTCCCGCGGGTCTGTCTCTTGCTTCAACA |
| RNU1 | 419546 | 37656 | 1966 | 10585 | 452 | 429 | 321 | 17986 | 1634 | ATACTTACCTGGCAGGGGAGATACCATGATCACGAAGGTG |
| RNU11 | 383389 | 360 | 74 | 115 | 15 | 3 | 12 | 842 | 5 | AAAAAGGGCTTCTGTCGTGAGTGGCACACGTAGGGCAACT |
| RN7SL1/RN7SL2 | 291652 | 0 | 0 | 0 | 0 | 0 | 0 | 2 | 0 | GCCGGGCGCGGTGGCGCGTGCCTGTAGTCCCAGCTACTCG |
| FTH1 | 175347 | 679 | 44 | 368 | 15 | 7 | 12 | 400 | 10 | AGACGTTCTTCGCCGAGAGTCGTCGGGGTTTCCTGCTTCA |
| SNORD3 | 170430 | 1514 | 326 | 602 | 67 | 44 | 20 | 5523 | 62 | AAGACTATACTTTCAGGGATCATTTCTATAGTGTGTTACT |
| Anti-SNORD3 | 132751 | 12 | 0 | 0 | 0 | 0 | 0 | 0 | 0 | ATGGCTGACGGCAGTTGCAGCCAAGCAACGCCAGAAAGCC |
| RBMX | 78259 | 163 | 25 | 66 | 15 | 0 | 5 | 395 | 10 | CTCGTTGCGCAGTAGTGCTAGCGGCTTCGCGGTTCGGTCC |
| RNU5 | 65382 | 15 | 2 | 10 | 0 | 0 | 0 | 59 | 5 | ATTCACTGGTTTCTCTTCAGATCGAATAAATCTTTCGCCT |
| RPL12 | 63128 | 206 | 18 | 31 | 10 | 8 | 0 | 130 | 10 | CTCTCGGCTTTCGGCTCGGAGGAGGCCAAGGTGCAACTTC |
| RPL9 | 62380 | 41 | 7 | 0 | 0 | 0 | 0 | 56 | 7 | CTTTCTTTGCTGCGTCTACTGCGAGAATGAAGACTATTCT |
| PRDX1 | 56036 | 84 | 36 | 51 | 0 | 0 | 2 | 184 | 0 | GCGTCTTGTTCTTGCCTGGTGTCGGTGGTTAGTTTCTGCG |
| NPM1 | 55723 | 0 | 0 | 3 | 0 | 0 | 0 | 0 | 0 | TCGTCATCATCTTCATCAGCAGCAAGTTTTACTTTTTTCT |
| PCNA | 46008 | 128 | 16 | 87 | 0 | 7 | 3 | 240 | 16 | ATTAAACGGTTGCAGGCGTAGCAGAGTGGTCGTTGTCTTT |
| RPLP1 | 45903 | 278 | 0 | 12 | 0 | 0 | 0 | 187 | 3 | CCCTTTCCTCAGCTGCCGCCAAGGTGCTCGGTCCTTCCGA |
| RNU5 | 44157 | 345 | 102 | 43 | 2 | 5 | 7 | 1273 | 18 | ATACTCTGGTTTCTCTTCAAATCGTATAAATCTTTCGCCT |
| not annotated | 35920 | 156 | 20 | 143 | 7 | 0 | 8 | 516 | 3 | ACAAAGCGTTGGGTGAGACTCCTCTTGCTCGTCATGTCTG |
| RPL13 | 34080 | 66 | 0 | 15 | 0 | 2 | 0 | 62 | 0 | CTTTCCGCTCGGCTGTTTTCCTGCGCAGGAGCCGCAGGGC |
| RPL23A | 28874 | 35 | 3 | 10 | 0 | 0 | 0 | 59 | 0 | CTTTTCACAAGATGGCGCCGAAAGCGAAGAAGGAAGCTCC |
| EEF1A1 | 27262 | 130 | 8 | 18 | 8 | 0 | 0 | 304 | 13 | CTTTTTCGCAACGGGTTTGCCGCCAGAACACAGGTGTCGT |
| RPL19 | 24760 | 229 | 3 | 0 | 0 | 0 | 0 | 327 | 0 | CTTTCCTTTCGCTGCTGCGGCCGCAGCCATGAGTATGCTC |
| SNORD118/TMEM107 | 23755 | 482 | 76 | 145 | 104 | 12 | 12 | 714 | 15 | ATCGTCAGGTGGGATAATCCTTACCTGTTCCTCCTCCGGA |
| not anotated | 22728 | 631 | 31 | 189 | 25 | 5 | 3 | 288 | 8 | AGGGATTTTTTAATTTTAAGCTATTTGTCTGTTAAGTATA |
| HIST1H1D | 21513 | 44 | 12 | 12 | 0 | 0 | 0 | 92 | 0 | ATGCTGTTCTGACAGTTTGAGATTACTTATTGTCTTTTCT |
| RPL26 | 21345 | 82 | 0 | 16 | 0 | 0 | 5 | 143 | 8 | CTCTTCCCTTTTGCGGCCATCACCGAAGCGGGAGCGGCCA |
| ANXA1 | 20678 | 25 | 5 | 8 | 2 | 3 | 7 | 156 | 7 | AGTGTGAAATCTTCAGAGAAGAATTTCTCTTTAGTTCTTT |
| RPL19 | 19367 | 0 | 0 | 0 | 0 | 0 | 0 | 53 | 0 | CCTTTCGCTGCTGCGGCCGCAGCCATGAGTATGCTCAGGC |
| HSBP1 | 19257 | 0 | 0 | 2 | 0 | 0 | 0 | 0 | 0 | ATTCTCCCAATGATCTGGTCAGACATGGTCTGAAATTTAT |
| RPL10 | 18004 | 97 | 2 | 31 | 10 | 0 | 0 | 434 | 16 | CTCTTTCCCTTCGGTGTGCCACTGAAGATCCTGGTGTCGC |
| PTGS2 | 16395 | 133 | 15 | 28 | 3 | 2 | 0 | 161 | 3 | AATTGTCATACGACTTGCAGTGAGCGTCAGGAGCACGTCC |
| RPS3A | 16385 | 61 | 15 | 5 | 0 | 0 | 0 | 117 | 7 | CCTTTTGGCTCTCTGACCAGCACCATGGCGGTTGGCAAGA |
| EEF1G | 15218 | 46 | 2 | 0 | 0 | 0 | 0 | 81 | 7 | CTTTCTTTGCGGAATCACCATGGCGGCTGGGACCCTGTAC |
| RPS24 | 14590 | 82 | 0 | 10 | 0 | 0 | 2 | 390 | 0 | CTCTTTTCCTCCTTGGCTGTCTGAAGATAGATCGCCATCA |
| TPT1 | 14177 | 38 | 3 | 8 | 0 | 0 | 3 | 117 | 0 | CTTTTCCGCCCGCTCCCCCCTCCCCCCGAGCGCCGCTCCG |
| RPS9 | 14032 | 105 | 0 | 0 | 2 | 0 | 2 | 176 | 0 | CTCTTTCTCAGTGACCGGGTGGTTTGCTTAGGCGCAGACG |
| RPS29 | 13835 | 38 | 3 | 35 | 0 | 0 | 0 | 204 | 2 | CTTTTACCTCGTTGCACTGCTGAGAGCAAGATGGGTCACC |
| ACTB | 13782 | 110 | 28 | 48 | 18 | 0 | 8 | 288 | 5 | ACCGCCGAGACCGCGTCCGCCCCGCGAGCACAGAGCCTCG |
| RPS20 | 13352 | 26 | 0 | 20 | 0 | 0 | 0 | 136 | 0 | CTTTTTGAGGAAGACGCGGTCGTAAGGGCTGAGGATTTTT |
| RNU4 | 13176 | 179 | 26 | 118 | 2 | 2 | 3 | 391 | 26 | AGCTTTGCGCAGTGGCAGTATCGTAGCCAATGAGGTCTAT |
| RPL28 | 12766 | 99 | 0 | 10 | 0 | 2 | 0 | 92 | 3 | CTCTTTCCGTCTCAGGTCGCCGCTGCGAAGGGAGCCGCCG |
| not annotated | 12526 | 67 | 7 | 23 | 0 | 0 | 0 | 77 | 3 | CTTTCAGCGCCTGCAGGTTCCGGGAGGTCAGCTCCCAGCC |
| RPL18A | 12462 | 12 | 7 | 7 | 0 | 0 | 0 | 8 | 0 | CCTTTTGCGGGTGGCGGCGAACGCGGAGAGCACGCCATGA |
| RPL41 | 12429 | 115 | 10 | 33 | 5 | 0 | 7 | 59 | 0 | CTCTCGGCCTTAGCGCCATTTTTTTGGAAACCTCTGCGCC |
| TUBA1B | 12416 | 107 | 31 | 72 | 0 | 0 | 0 | 189 | 3 | AGTGCGTTACTTACCTCGACTCTTAGCTTGTCGGGGACGG |
| UCHL1 | 12357 | 0 | 0 | 0 | 0 | 0 | 0 | 5 | 0 | AGTTCATAGAGGTGGCCATCCACGTTGTTAAACAGAATAA |
| RPL37 | 12027 | 105 | 7 | 16 | 0 | 2 | 2 | 113 | 10 | CTTTCTGGTCTCGGCCGCAGAAGCGAGATGACGAAGGGAA |
| RTN3 | 11944 | 26 | 3 | 16 | 2 | 0 | 0 | 41 | 3 | AGTCTGTCGGAGTCTGTCCTCGGAGCAGGCGGAGTAAAGG |
| TMSB10 | 11512 | 110 | 0 | 26 | 2 | 5 | 0 | 227 | 16 | TGTTTCTTGCTGCAGCAACGCGAGTGGGAGCACCAGGATC |
| LDHA | 11505 | 26 | 3 | 3 | 0 | 0 | 0 | 16 | 0 | GTGCTGCAGCCGCTGCCGCCGATTCCGGATCTCATTGCCA |
| RPL10 | 11463 | 97 | 2 | 31 | 10 | 0 | 0 | 432 | 16 | CTCTTTCCCTTCGGTGTGGTGAGTAAGCGCAGTTGTCGTC |
| not annotated | 11344 | 2 | 2 | 0 | 0 | 0 | 0 | 0 | 0 | ACGGCCGGGCGCGGTGGCTCACTCCTGGAATCCCAGCACT |
| FTL | 10956 | 0 | 0 | 0 | 0 | 0 | 0 | 5 | 0 | CTCGCAGTTCGGCGGTCCCGCGGGTCTGTCTCTTGCTTCA |
| RPL23A | 10867 | 74 | 7 | 46 | 0 | 3 | 0 | 284 | 2 | ACAAGATGGCGCCGAAAGCGAAGAAGGAAGCTCCTGCCCC |
| RPL27A | 10596 | 155 | 30 | 30 | 2 | 3 | 5 | 432 | 12 | CTTTTTCGTCTGGGCTGCCAACATGCCATCCAGACTGAGG |
| RPS4X | 9957 | 176 | 5 | 0 | 0 | 0 | 0 | 278 | 0 | CTCTTTCCTTGCCTAACGCAGCCATGGCTCGTGGTCCCAA |
| SNORD13 | 9666 | 552 | 20 | 347 | 12 | 8 | 0 | 531 | 0 | GATCCTTTTGTAGTTCATGAGCGTGATGATTGGGTGTTCA |
| RPS19 | 9427 | 85 | 5 | 20 | 2 | 3 | 2 | 441 | 5 | CCCTTTCCCCTGGCTGGCAGCGCGGAGGCCGCACGATGCC |
| KPNA2 | 9414 | 140 | 21 | 62 | 3 | 3 | 5 | 423 | 28 | ACACGGTCTTTGAGCTGAGTCGAGGTGGACCCTTTGAACG |
| RPS11 | 9261 | 43 | 0 | 18 | 0 | 0 | 0 | 159 | 0 | CTTTTTTTCAGGCGGCCGGGAAGATGGCGGACATTCAGAC |
| RPS27A | 9258 | 23 | 10 | 12 | 0 | 0 | 0 | 53 | 2 | CTTTTCGATCCGCCATCTGCGGTGGAGCCGCCACCAAAAT |
| HIST1H1C | 9113 | 128 | 31 | 5 | 2 | 0 | 0 | 187 | 0 | ATCGGCGCTTTGCCACTTGTACCCGAGTTTTTGATTCTCA |
| RPL29 | 9092 | 31 | 0 | 0 | 5 | 0 | 0 | 84 | 0 | CTCTTCCGGTTCTAGGCGCTTCGGGAGCCGCGGCTTATGG |
| RPL22 | 8694 | 8 | 0 | 0 | 0 | 0 | 0 | 10 | 0 | CTTTCTAACTCCGCTGCCGCCATGGCTCCTGTGAAAAAGC |
| RPL11 | 8682 | 0 | 0 | 0 | 0 | 0 | 0 | 3 | 0 | CTCTTCCTGCTCTCCATCATGGCGCAGGATCAAGGTGAAA |
| CAV1 | 8594 | 0 | 0 | 0 | 0 | 0 | 0 | 2 | 0 | GTGCACGGAGCCGTAGCTGTCGGAGCGGTTAGTTCGATTT |
| RNU7 | 8572 | 0 | 62 | 0 | 0 | 0 | 0 | 30 | 0 | AGTGTTACAGCTCTTTTAGAATTTGTCTAGTAGGCTTTCT |
| MYL12B | 7954 | 3 | 0 | 0 | 0 | 0 | 0 | 8 | 0 | AGGAAGTGTCGGCGCCGCCACTGTCCGGCCACAGCCTAAC |
| RPS17/RPS17L | 7619 | 12 | 2 | 16 | 0 | 0 | 0 | 230 | 3 | CTCTTTTACCAAGGACCCGCCAACATGGGCCGCGTTCGCA |
| RPL38 | 7573 | 3 | 0 | 0 | 0 | 0 | 0 | 5 | 0 | CTTTTCCCCGGTTGCTGCTTGCTGTCCTGGTCCGCGCCAG |
| TMSB4X/TMSB4XP4 | 7449 | 74 | 10 | 25 | 3 | 2 | 12 | 104 | 5 | AACTCGGTGGTGGCCACTGCGCAGACCAGACTTCGCTCGT |
| KRT8 | 7435 | 3 | 0 | 0 | 0 | 0 | 0 | 0 | 0 | GCTCCTGGTACTCACGCAGCTGCCGCGCCATGTCCTGCTT |
| DDX39B | 7267 | 12 | 0 | 3 | 0 | 0 | 0 | 16 | 0 | AGATTTCCCTCCTTCGTCGCTGTTGCTGCCGCCATACGCG |
| EIF4G2 | 7199 | 43 | 10 | 21 | 0 | 0 | 5 | 194 | 2 | AGCAGTGAGTCGGAGCTCTATGGAGGTGGCAGCGGGTACC |
| HIST1H2BN | 6999 | 18 | 2 | 51 | 0 | 0 | 0 | 100 | 0 | ACTTGCGTTAAGAAGCAGTGAATAAGCGGTAGGTTGACAG |
| HIST1H2BB | 6976 | 36 | 3 | 8 | 0 | 0 | 0 | 18 | 0 | ACTACTCTGTAGTGGAGAGTGTTAGTAGCTTTTCTATTCT |
| EIF1 | 6765 | 94 | 0 | 28 | 0 | 5 | 0 | 404 | 2 | CCCAGTCACTGAGCCGCCGCCGAGGATTCAGCAGCCTCCC |
| ATF5 | 6710 | 36 | 5 | 2 | 0 | 0 | 0 | 110 | 0 | ATTCCCTGTCCTCGGATCACAGTCTCTTCTCACTACAGTG |
| NPM1 | 6407 | 25 | 16 | 31 | 0 | 0 | 0 | 145 | 3 | TCCCTGGTGTGATTCCGTCCTGCGCGGTTGTTCTCTGGAG |
| RPL18A | 6302 | 16 | 0 | 8 | 0 | 0 | 0 | 51 | 0 | CTTCCTTTTGCGGGTGGCGGCGAACGCGGAGAGCACGCCA |
| PDIA6 | 5988 | 0 | 0 | 0 | 0 | 2 | 0 | 0 | 0 | CTAGAGGAATACAGACCATTCACTGCCAGAAAGAAGGTAC |
| EEF2 | 5955 | 87 | 5 | 5 | 0 | 0 | 3 | 122 | 0 | CTCTTCCGCCGTCGTCGCCGCCATCCTCGGCGCGACTCGC |
| SLC25A3 | 5841 | 15 | 10 | 3 | 2 | 0 | 0 | 30 | 12 | CTCTGTGAGCCGCAACCTTTCCAAGGGAGTGGTTGTGTGA |
| FTH1 | 5771 | 21 | 0 | 16 | 0 | 0 | 0 | 8 | 0 | GTTCTTCGCCGAGAGTCGTCGGGGTTTCCTGCTTCAACAG |
| RPL38 | 5684 | 0 | 0 | 2 | 0 | 0 | 0 | 0 | 0 | CTTTTTCGTCCTTTTCCCCGGTTGCTGCTTGCTGTCCTGG |
| PKM | 5679 | 194 | 3 | 66 | 12 | 0 | 0 | 179 | 12 | GCACAGCAGCTGCACGCGCCGTGGCTCCGGATCTCTTCGT |
| TPM2 | 5414 | 25 | 7 | 5 | 0 | 3 | 3 | 104 | 0 | AGTCCCGCTCCGTCCTCCTCGCCTGCCACCGGTGCACCCA |
| RPL36A | 5348 | 26 | 0 | 7 | 0 | 0 | 0 | 12 | 0 | CTTTCCGCGCCGATAGCGCTCACGCAAGCATGGTTAACGT |
| RPS12 | 5299 | 0 | 3 | 8 | 0 | 0 | 0 | 337 | 13 | CTCTTTCCCTGCCGCCGCCGAGTCGCGCGGAGGCGGAGGC |
| DDX17 | 5184 | 36 | 0 | 15 | 0 | 0 | 0 | 59 | 0 | ATTTTGTGCAGTCGCTGGGAAGGAAGGAGACGCCTAAACC |
| NPM1 | 5166 | 35 | 0 | 7 | 2 | 0 | 0 | 33 | 0 | CTTTCCCTGGTGTGATTCCGTCCTGCGCGGTTGTTCTCTG |
| RPL32 | 5136 | 76 | 0 | 0 | 0 | 0 | 0 | 67 | 0 | CTCTTCCTCGGCGCTGCCTACGGAGGTGGCAGCCATCTCC |
| SNORD3 | 5072 | 815 | 61 | 230 | 38 | 16 | 13 | 1064 | 28 | ATTAAGACTATACTTTCAGGGATCATTTCTATAGTGTGTT |
| PSMA5 | 4939 | 10 | 0 | 0 | 0 | 0 | 0 | 10 | 2 | AGTTGGTCCTTAGTACTGCGGCCGTGTGGGTGAGTTGGCT |
| PTCH2 | 4929 | 122 | 31 | 69 | 0 | 0 | 5 | 324 | 10 | ATATACTCGGGTTTCTCTTCAAAGCGCATAAATCTTTCGC |
| RPL36A | 4843 | 0 | 0 | 12 | 0 | 0 | 0 | 36 | 0 | CTTTCTTTCCGCGCCGATAGCGCTCACGCAAGCATGGTTA |
| PABPC1 | 3990 | 0 | 0 | 8 | 0 | 0 | 0 | 266 | 0 | CCTTCTCCCCGGCGGTTAGTGCTGAGAGTGCGGAGTGTGT |
| RPL38 | 3482 | 23 | 3 | 0 | 0 | 0 | 0 | 20 | 0 | CTCTAGGGTGATACGTGGGTGAGAAAGGTCCTGGTCCGCG |
| SLC25A6 | 3431 | 15 | 0 | 8 | 0 | 0 | 0 | 43 | 0 | CCTTTCGGTCCAGGCGGCGGCAGGGCTGAGCCAGCGACGC |
| MELK | 3352 | 21 | 0 | 5 | 0 | 0 | 0 | 35 | 0 | ACAACCCGGCGATCGAAAAGATTCTTAGGAACGCCGTACC |
| 1The sampling size was normalized to 10 million non-structural host RNA reads.  2The first 40 nucleotides of the RNA sequence are derived from the gene listed in the first column, and snatched by influenza virus segments 1-8 as indicated. | | | | | | | | | | |
